# Supplementary material for: Facile and scalable synthesis of a sulfur, selenium and nitrogen co-doped hard carbon anode for high performance Na- and K-ion batteries
Source: Royal Society of Chemistry journal article supplement (doi:10.1039/d0ta04513f), 2020-01-01
Supplement: d0ta04513f1.pdf [file d0ta04513f1.pdf]

## Electronic Supporting Information

# **A Facile and Scalable Synthesis of Sulfur, Selenium and Nitrogen co-doped Hard Carbon Anode for High Performance Na- and K-ion Batteries**

Yu Liu<sup>a,#</sup>, Haodong Dai<sup>b,#</sup>, Yongkang An<sup>a</sup>, Lijun Fu<sup>b,\*</sup>, Qinyou An<sup>a,\*</sup>, Yuping Wu<sup>b,\*</sup>

<sup>#</sup> Yu Liu and Haodong Dai contributed equally to this work

<sup>a</sup> State Key Laboratory of Advanced Technology for Materials Synthesis and Processing, Wuhan University of Technology, Wuhan 430070, People's Republic of China

<sup>b</sup> State Key Laboratory of Materials-Oriented Chemical Engineering and College of Energy Science and Engineering, Nanjing Tech University, Nanjing 211800, People's Republic of China

Corresponding authors: E-mail Address: [l.fu@njtech.edu.cn](mailto:l.fu@njtech.edu.cn), [lijunfufu@sina.com](mailto:lijunfufu@sina.com) (Lijun Fu); [anqinyou86@whut.edu.cn](mailto:anqinyou86@whut.edu.cn) (Qinyou An); [wuyp@njtech.edu.cn](mailto:wuyp@njtech.edu.cn) (Yuping Wu)

## Kinetics and quantitative analysis

Generally, the relationship between the peak current and the scan rate is in harmony with a power law, according to Equation (S1):<sup>1, 2</sup>

$$i(V)=av^b \quad (S1)$$

where  $i$  represents peak current,  $v$  represents scan rate,  $a$  and  $b$  are adjustable constants. By sketching the relationship of  $\log(i)$  against  $\log(v)$ , the value of  $b$  can be calculated. When the value of  $b$  equals 0.5, it indicates an ideal faradaic intercalation process, while the value gets close to 1, it presents a surficial charge storage procedure without diffusion process.

Moreover, the capacity contribution can be further quantitatively separated into capacitive effects ( $k_1v$ ) and diffusion-controlled reactions ( $k_2v^{1/2}$ ), according to the Equation (S2):<sup>1, 2</sup>

$$i(V)=k_1v+k_2v^{1/2} \quad (S2)$$

The current response  $i$  at a fixed potential can be regarded as the combination of surface-controlled and diffusion-dependent processes, which are proportional to  $v$  and  $v^{1/2}$ . By counting  $k_1$  and  $k_2$  at fixed potentials, the proportion of the current from each contribution can be quantified into the two processes.

The diffusion coefficient ( $D$ ) of electrode is calculated from the galvanostatic intermittent titration (GITT) potential profiles using Fick's second law with the following equation(S3):

$$D = \frac{4}{\pi\tau} \left( \frac{m_B V_M}{M_B S} \right)^2 \left( \frac{\Delta E_S}{\Delta E_\tau} \right)^2 \quad (S3)$$

where  $\tau$  is the duration of the current impulse;  $m_B$  is the mass load of the electrode material;  $S$  represents the geometric area of the electrode;  $\Delta E_S$  is the quasi-thermodynamic equilibrium potential difference between before and after the current pulse;  $\Delta E_\tau$  represents the potential difference during the current pulse;  $V_M$  is the molar

volume of the materials; and  $M_B$  is the molar mass of carbon. The relative value of  $M_B/V_M$  can be calculated from the density of materials, which is calculated with Equation (S4)

$$\rho = \frac{1}{V_{total} + \frac{1}{\rho_{carbon}}} \quad (S4)$$

where  $\rho$  ( $\text{g cm}^{-3}$ ) is the density of materials,  $V_{total}$  ( $\text{cm}^3 \text{ g}^{-1}$ ) is the total pore volume analyzed from the  $\text{N}_2$  isotherm, and  $\rho_{carbon}$  is the true density of carbon ( $2 \text{ g cm}^{-3}$ ).

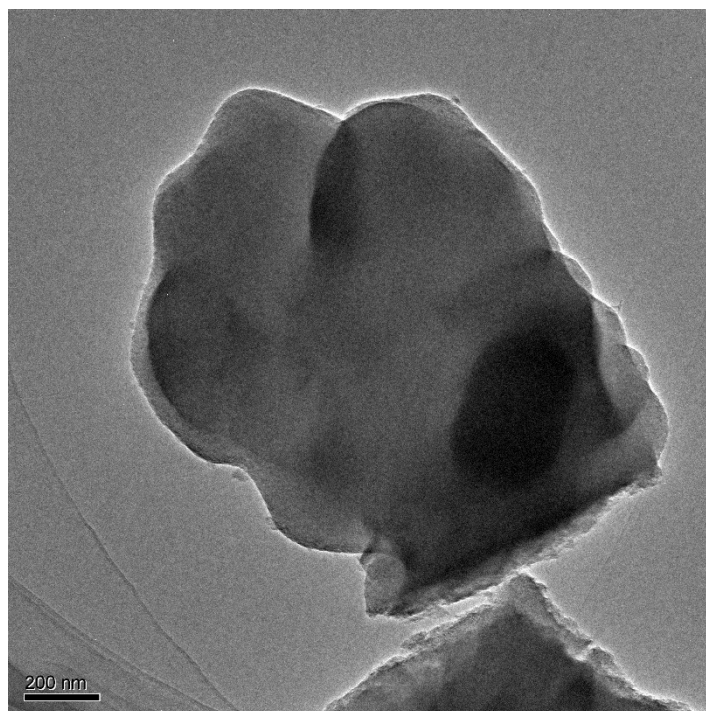

Figure S1 The TEM image of CPAN.

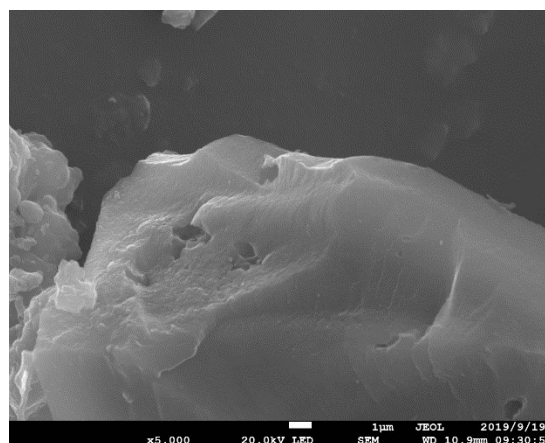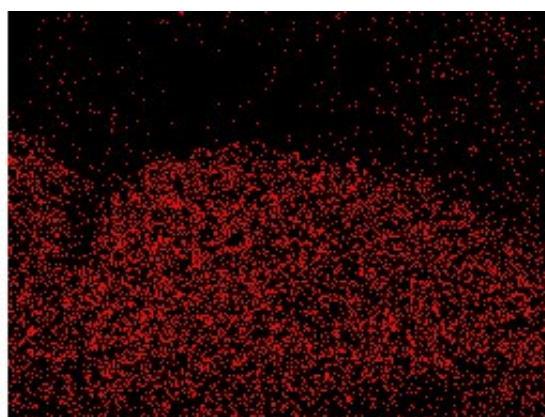

C Ka1\_2

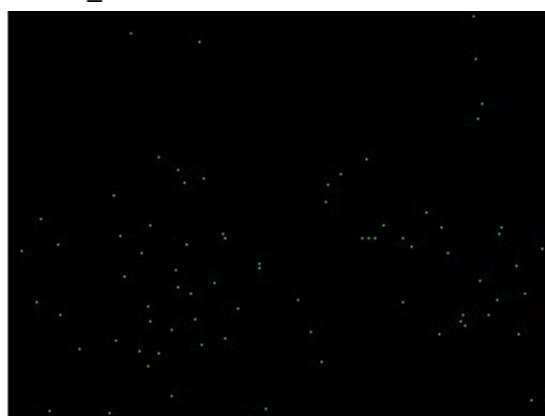

N Ka1\_2

Figure S2 The EDS mapping of CPAN.

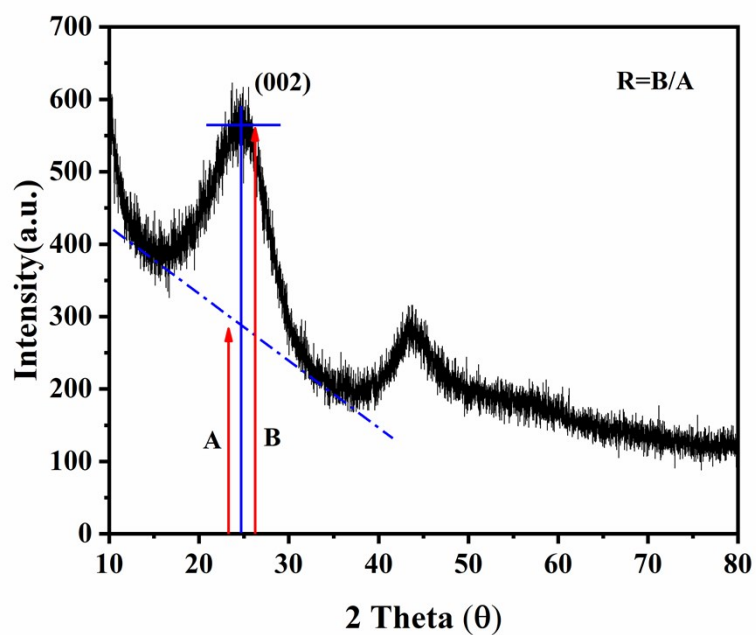

Figure S3 Calculation of the R value. Illustration of the calculation of the empirical R value according to the study of Dahn et al<sup>3</sup>. The XRD pattern of SSHC and CPAN are used as an example.

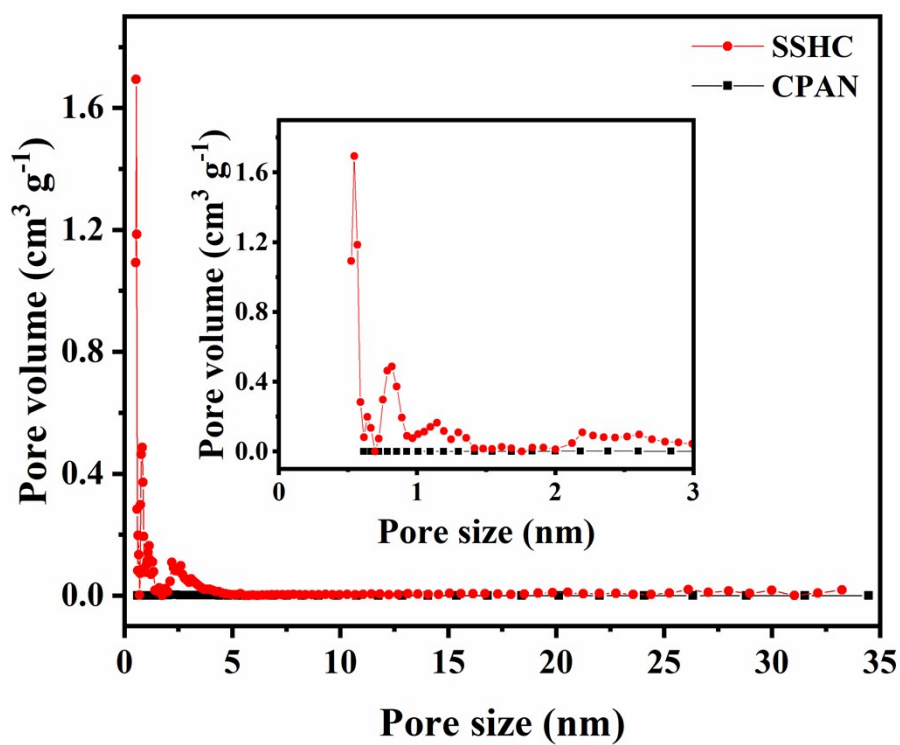

Figure S4 Pore size distribution of the CPAN and SSHC.

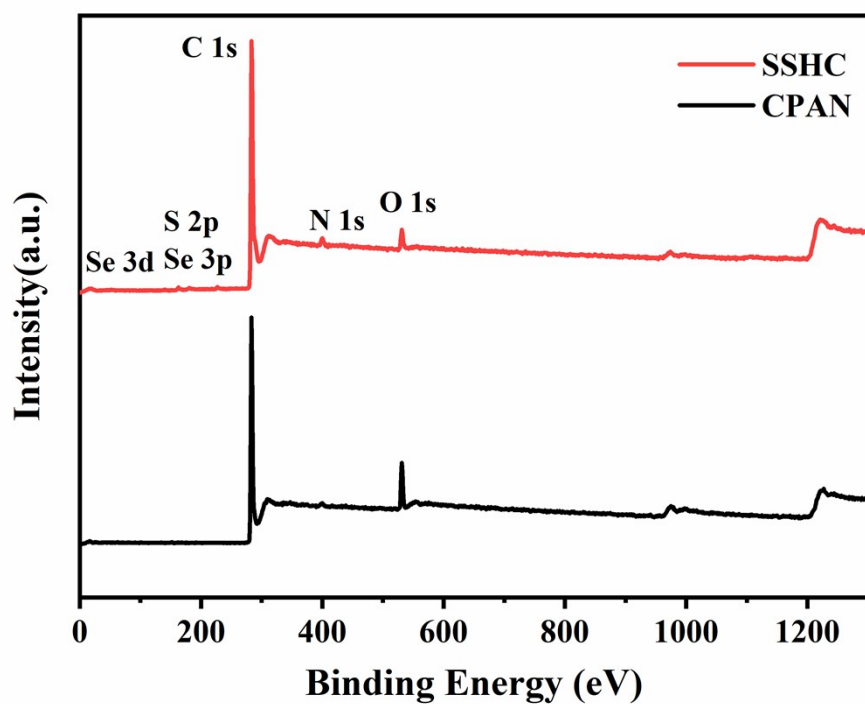

Figure S5 XPS survey spectra of the CPAN and SSHC.



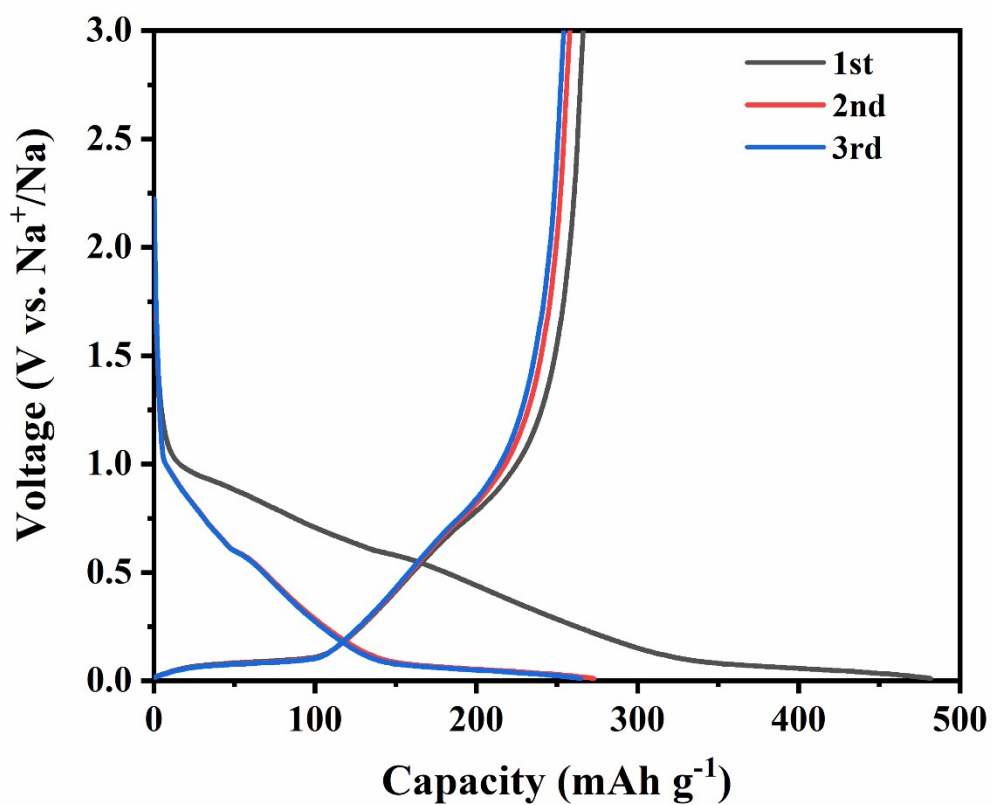

Figure S6 Electrochemical evaluation of the SSHC electrode in NIBs: Charge/discharge curves at a current density of 0.1 A g<sup>-1</sup>.

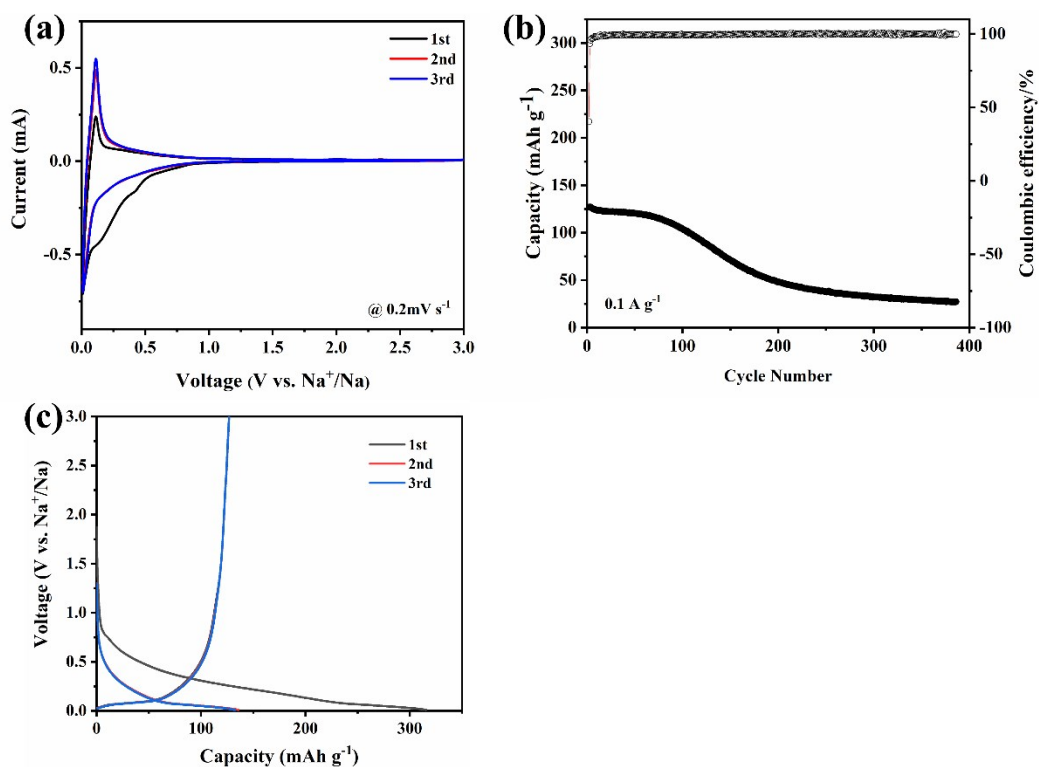

Figure S7 Sodium storage behaviors of CPAN. (a) First third consecutive CVs of the electrode made from CPAN in a voltage range of 0.01–3.0 V versus  $\text{Na}^+/\text{Na}$  at a scan rate of  $0.2 \text{ mV s}^{-1}$ . (b) Cycling performance of CPAN electrodes at  $0.1 \text{ A g}^{-1}$ . (c) First third Charge/discharge curves at a current density of  $0.1 \text{ A g}^{-1}$ .

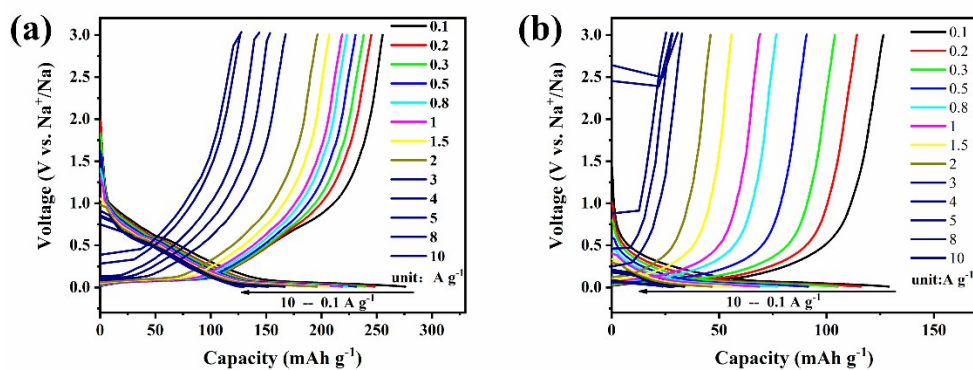

Figure S8 Charge/discharge profiles of (a) SSHC and (b) CPAN at different rates.

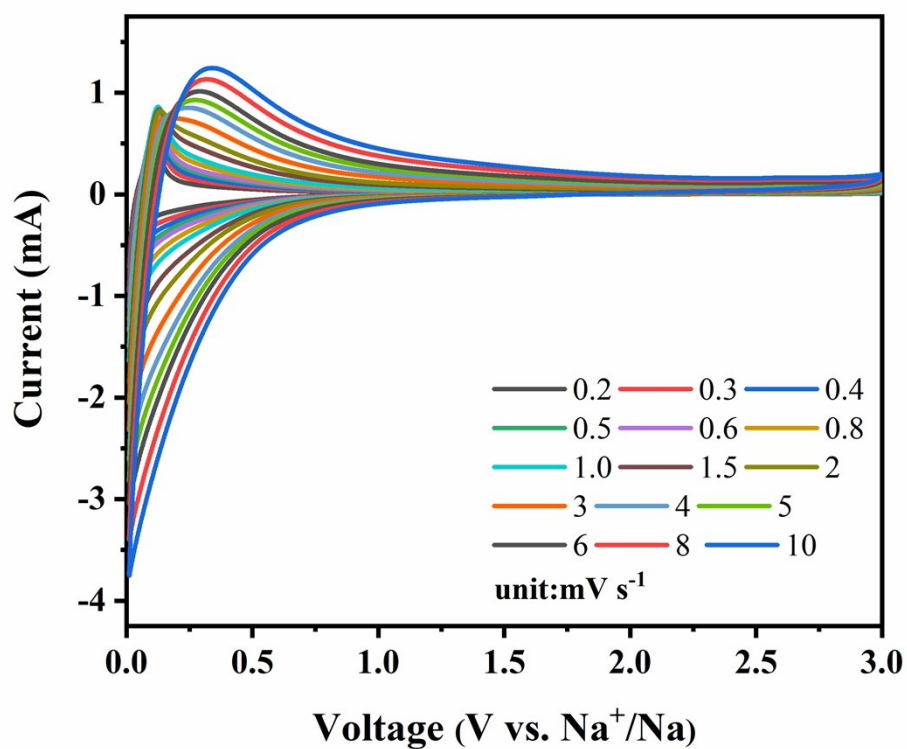

Figure S9 (a) CV curves of CPAN at the various scan rates from 0.2 to 10 mV s<sup>-1</sup>.

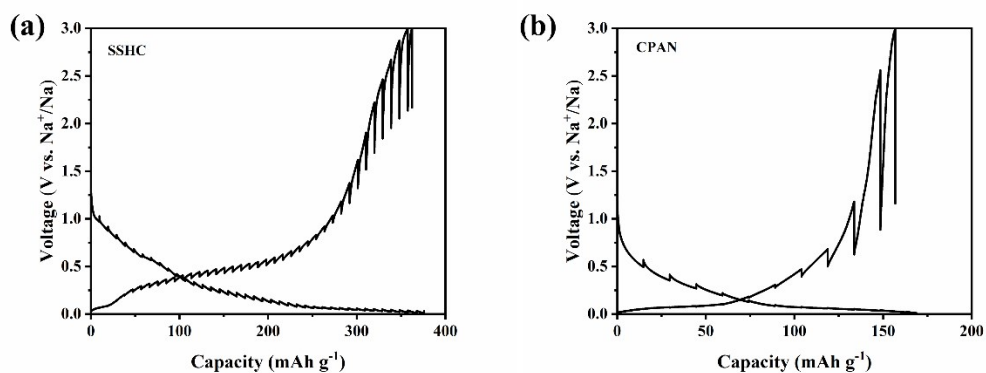

Figure S10 Study of the Na-ion diffusion coefficient of the SSHC and CPAN electrodes and the GITT profiles of the discharge/charge process.

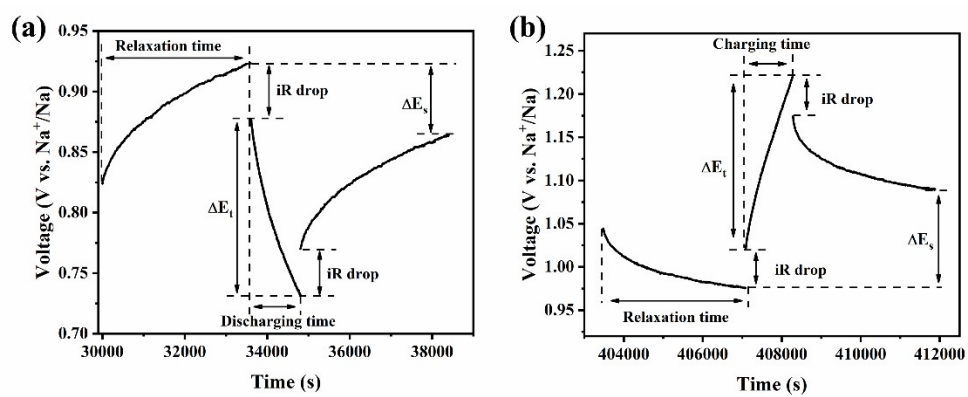

Figure S11 (a-b) Schematic of the calculation of diffusion coefficient using the GITT technique.

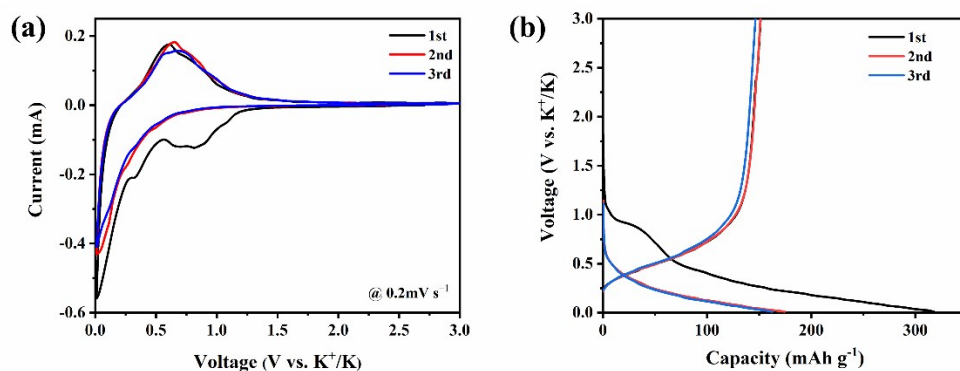

Figure S12 Electrochemical evaluation of the CPAN electrode for use in KIBs: (a) the first third CV curves of the electrode of SSHC in a voltage range of 0.01–3.0 V vs.  $K^+/K$  at a scan rate of  $0.2 \text{ mV s}^{-1}$ ; (b) charge/discharge curves at a current density of  $0.1 \text{ A g}^{-1}$ .

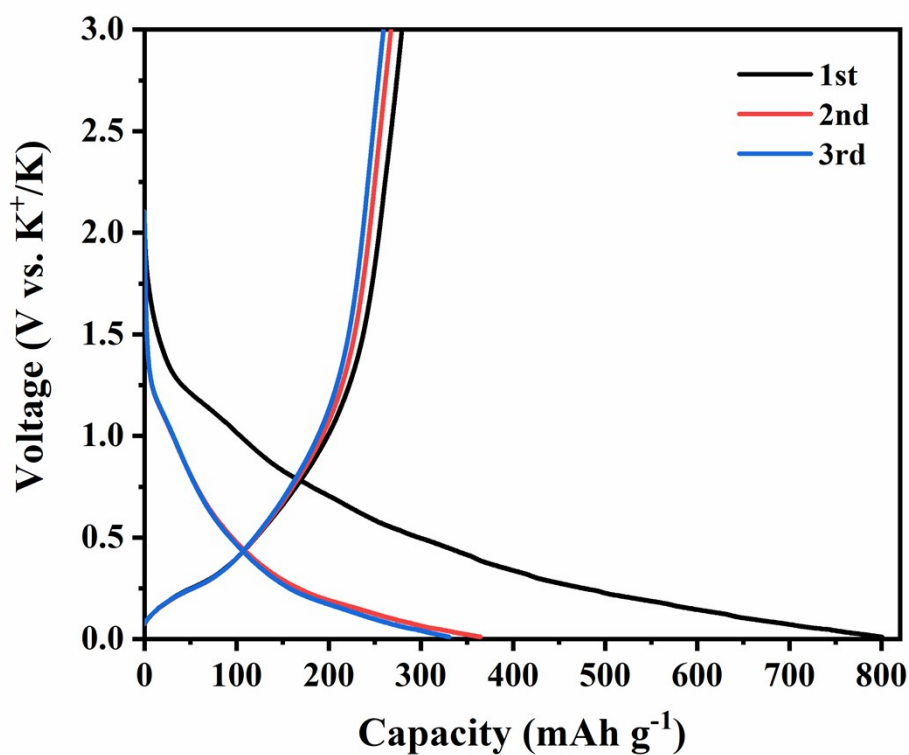

Figure S13 Electrochemical evaluation of the SSHC electrode in KIBs:  
Charge/discharge curves at a current density of 0.1 A g<sup>-1</sup>.



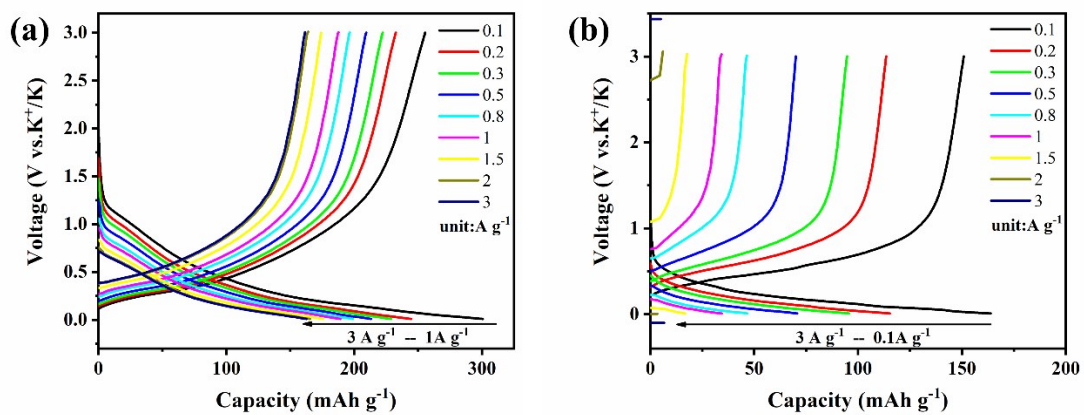

Figure S14 Charge/discharge profiles of (a) SSHC and (b) CPAN at different current densities.

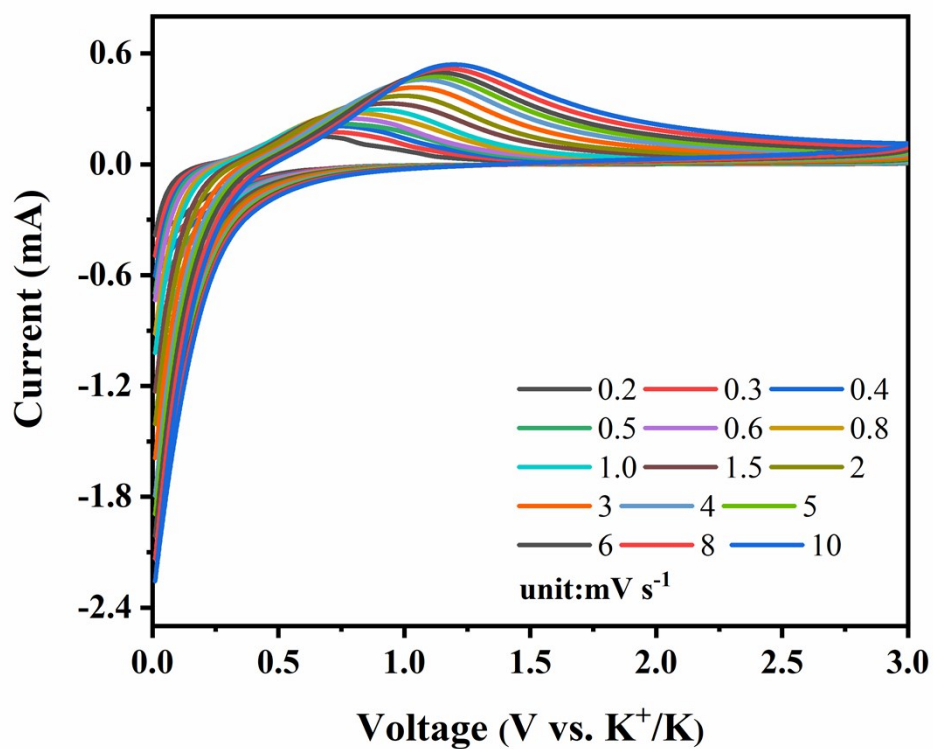

Figure S15 CV curves of CPAN in 1 M KPF<sub>6</sub> in ethylene carbonate and diethyl carbonate (EC: DEC = 1:1 v/v) electrolyte at the various scan rates from 0.2 to 10 mV s<sup>-1</sup>.

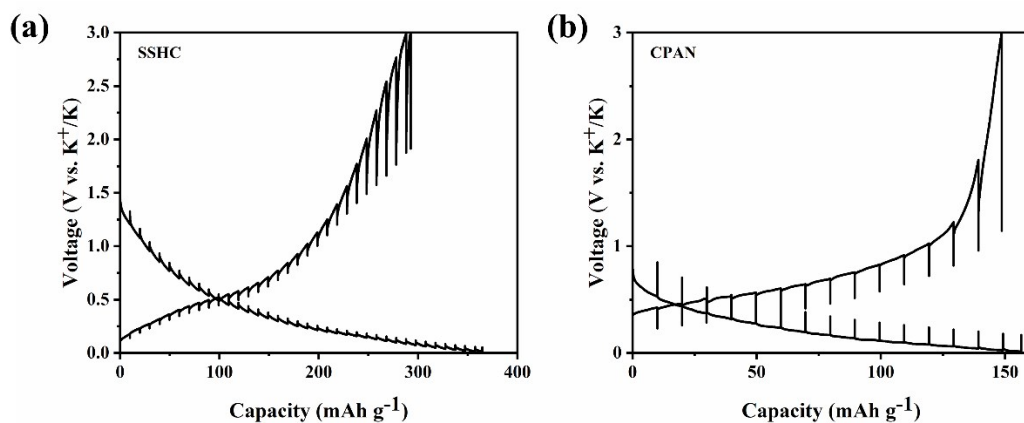

Figure S16 Study of the K-ion diffusion coefficient of the SSHC and CPAN electrodes and the GITT profiles of the discharge/charge process.

## References

- 1 V. Augustyn, J. Come, M. A. Lowe, J. W. Kim, P. L. Taberna, S. H. Tolbert, H. D. Abruna, P. Simon and B. Dunn, *Nat. Mater.*, 2013, **12**, 518-522.
- 2 T. Brezesinski, J. Wang, S. H. Tolbert and B. Dunn, *Nat. Mater.*, 2010, **9**, 146.
- 3 Y. Liu, J. S. Xue, T. Zheng and J. R. Dahn, *Carbon*, 1996, **34**, 193-200.
